# Supplementary material for: PEDOT:PSS-treated laser-induced graphene-based smart textile dry electrodes for long-term ECG monitoring
Source: Royal Society of Chemistry journal article supplement (doi:10.1039/d2nj04666k), 2022-12-08
Supplement: d2nj04666k1.pdf [file d2nj04666k1.pdf]

Supporting Information

## **PEDOT: PSS treated laser induced graphene based smart textile dry electrodes for long term ECG monitoring**

Yogita Maithani, B.R. Mehta, and J.P. Singh\*

Department of Physics, Indian Institute of Technology Delhi, Hauz Khas, New Delhi-110016, India

\* E-mail: [jpsingh@physics.iitd.ac.in](mailto:jpsingh@physics.iitd.ac.in)

| <b>Atomic Concentration (%)</b> | <b>Carbon</b> | <b>Nitrogen</b> | <b>Oxygen</b> | <b>Sulphur</b> |
|---------------------------------|---------------|-----------------|---------------|----------------|
| Bare Kevlar                     | 69.902        | 13.788          | 16.310        | 0              |
| LIG/PEDOT: PSS treated Kevlar   | 82.393        | 6.183           | 10.839        | 0.585          |

Table S1. Atomic concentration table of Kevlar and PEDOT: PSS treated LIG Kevlar.

| <b>Material specifications of PEDOT: PSS treated LIG Kevlar Electrode</b> |                                      |
|---------------------------------------------------------------------------|--------------------------------------|
| <b>Material</b>                                                           | <b>Polymer</b>                       |
| Backing material                                                          | Kevlar fabric                        |
| Sensor                                                                    | PEDOT:PSS and laser induced graphene |
| Eye protection                                                            | May cause eye irritation             |

Table S2. Basic specifications of proposed PEDOT: PSS treated LIG Kevlar Electrode.

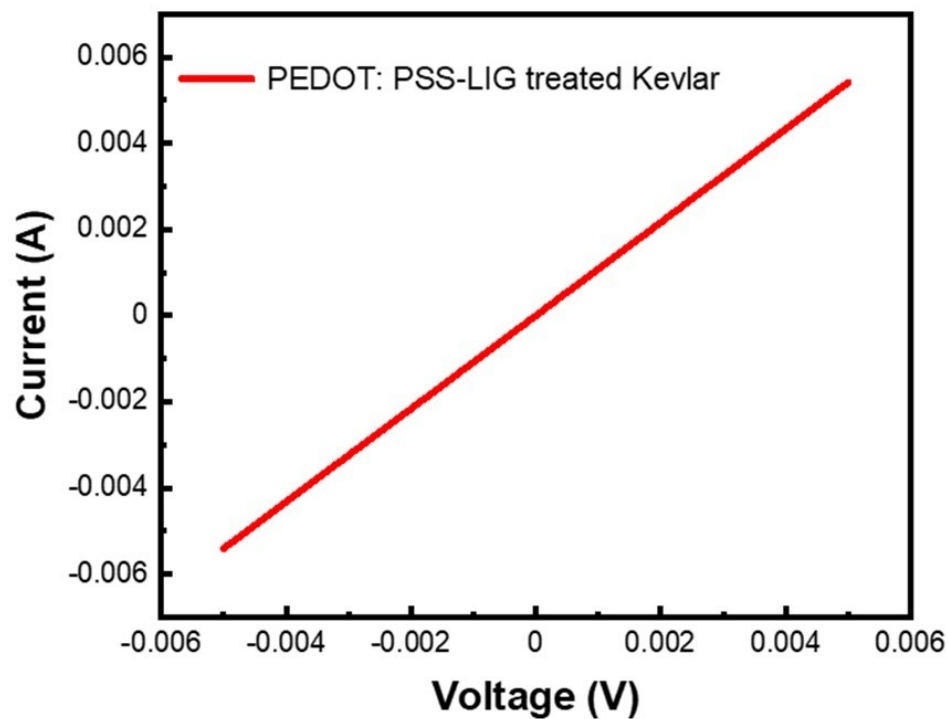

Figure S1: I-V characteristics of PEDOT: PSS treated LIG Kevlar fabric.

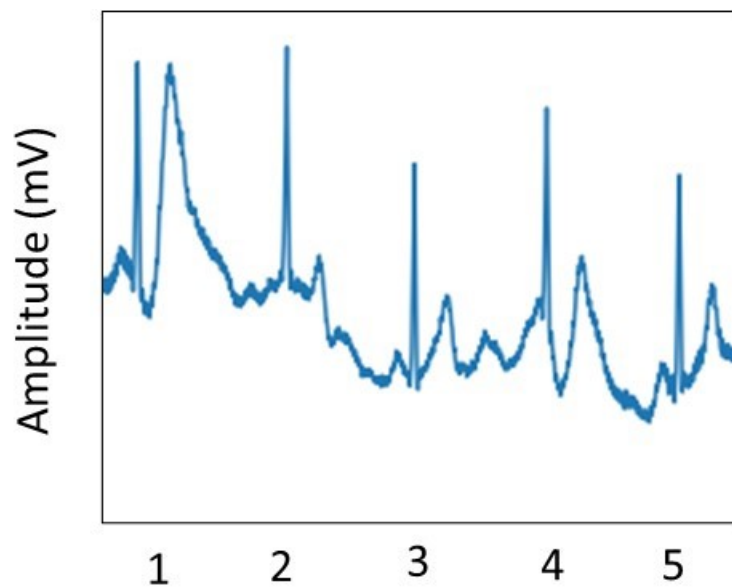

Figure S2: ECG signal obtained using PEDOT: PSS-LIG treated Kevlar dry electrode while subject was moving

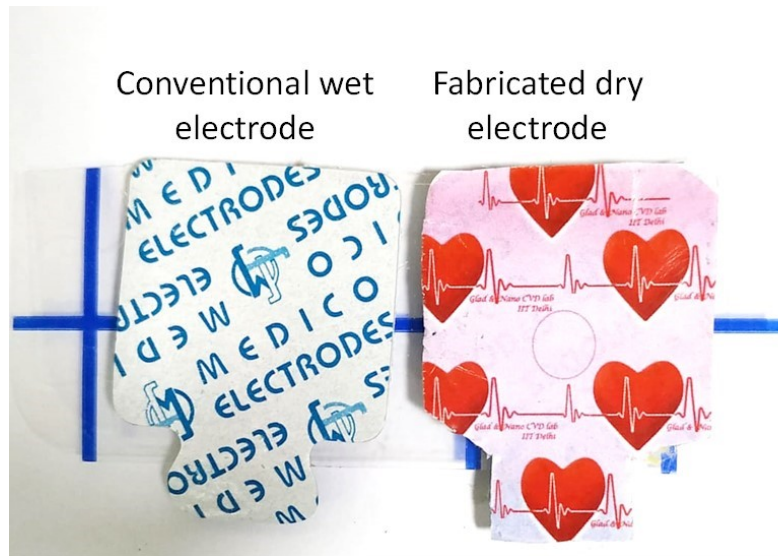

Figure S3: Optical images of conventional wet electrodes and fabricated dry electrode.

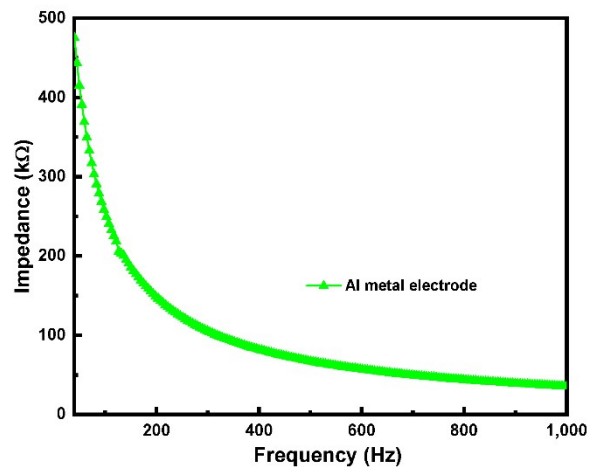

Figure S4: The variation of contact impedance of Al metal electrode with frequency.

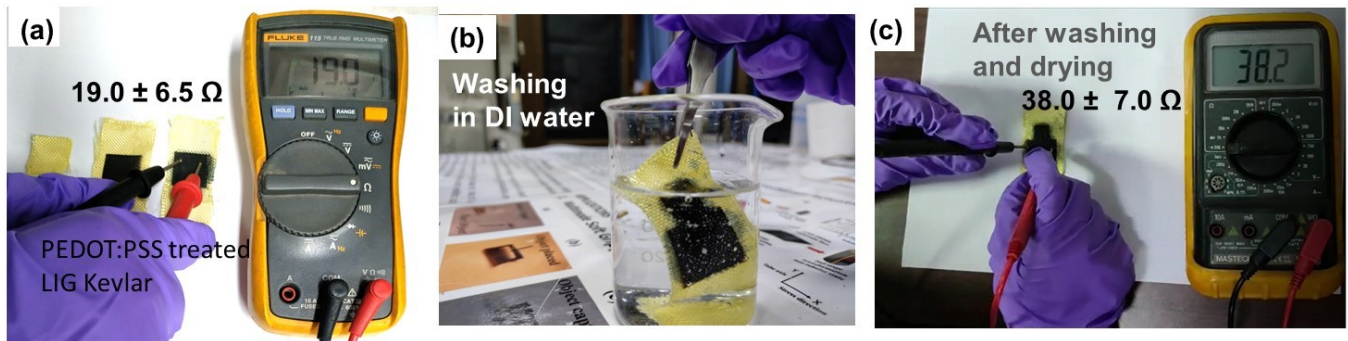

Figure S5: (a) Resistance of PEDOT: PSS-treated Kevlar electrode using a resistance meter before washing. (b) washing of PEDOT: PSS-treated Kevlar electrode with DI water, and (c) resistance after drying the fabricated dry electrode.

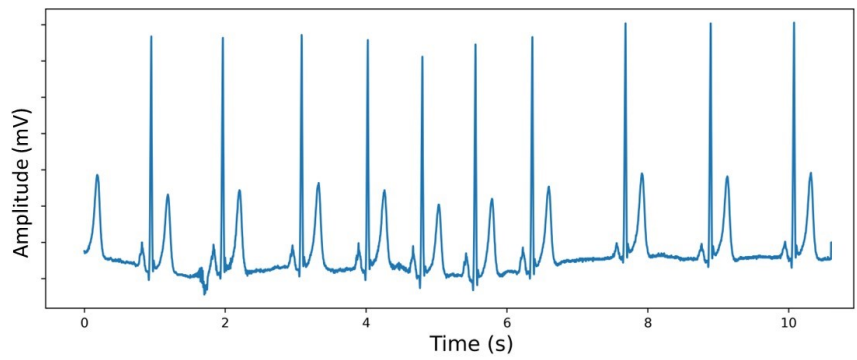

Figure S6: ECG signal recorded using proposed PEDOT: PSS-LIG treated Kevlar dry electrodes after 48 hours of uses.
